# Supplementary material
Source: HighWire-hosted journal article supplement (https://qualitysafety.bmj.com/content/bmjqs-2022-015538)
Supplement: inline-supplementary-material-2 [file inline-supplementary-material-2.pdf]

## SUPPLEMENTAL MATERIAL 2. ADDITIONAL INFORMATION ON THE TEN INVESTIGATED PROCEDURES AS PROVIDED TO SURVEY RESPONDENTS

| Procedure                                          | Description                                                                                                                                                                                                                                                                                |
|----------------------------------------------------|--------------------------------------------------------------------------------------------------------------------------------------------------------------------------------------------------------------------------------------------------------------------------------------------|
| Induction of labour (IOL)                          | Induction means that the labour did not start by itself, and had to be started with an infusion, medication, a balloon or tablets.                                                                                                                                                         |
| External cardiotocography (CTG)                    | CTG stands for 'cardiotocography', which is a method used to monitor the baby's heart rate, and involves placing a belt around the abdomen of the mother.                                                                                                                                  |
| Fetal scalp electrode placement                    | Fetal scalp electrode placement is a method used to monitor the baby's heart rate, and involves placing an electrode on the baby's head. This procedure is used during labour after the membranes have ruptured.                                                                           |
| Artificial rupture of the membranes (AROM)         | Artificial rupture of the membranes is when the care provider punctures the membranes during an vaginal examination. It's also known as breaking the waters. It may be done before labour (to induce labour) or during labour (accelerate labour).                                         |
| Vaginal examination                                | During a vaginal examination the care provider inserts his or her fingers into your vagina, for example to see how labour is progressing.                                                                                                                                                  |
| Augmentation of labour                             | When labour starts spontaneously but does not progress, contractions can be stimulated by administering medication.                                                                                                                                                                        |
| Episiotomy                                         | An episiotomy is performed when the care provider makes a cut in the skin between the vagina and the anus with the aim to help the baby to be born faster in the second stage of labour.                                                                                                   |
| Postpartum oxytocin administration                 | Oxytocin can be given after childbirth to make the uterus contract, with the aim to accelerate the birth of the placenta and prevent excessive bleeding.                                                                                                                                   |
| Prelabour caesarean section (prelabour CS)         | A caesarean section is the surgical delivery of a baby through the mother's abdomen, by making a cut (incision) in the abdomen and uterus. A Prelabour caesarean section is most often planned, and is performed when the labour has not started yet, for example when the baby is breech. |
| Caesarean section during labour (CS during labour) | A caesarean section during labour is performed after the onset of labour.                                                                                                                                                                                                                  |
