# Supplementary material
Source: HighWire-hosted journal article supplement (https://qualitysafety.bmj.com/content/bmjqs-2022-015538)

### SUPPLEMENTAL MATERIAL 5. FLOWCHART OF THE RESPONDENTS INCLUDED IN ANALYSIS (N=11,418)

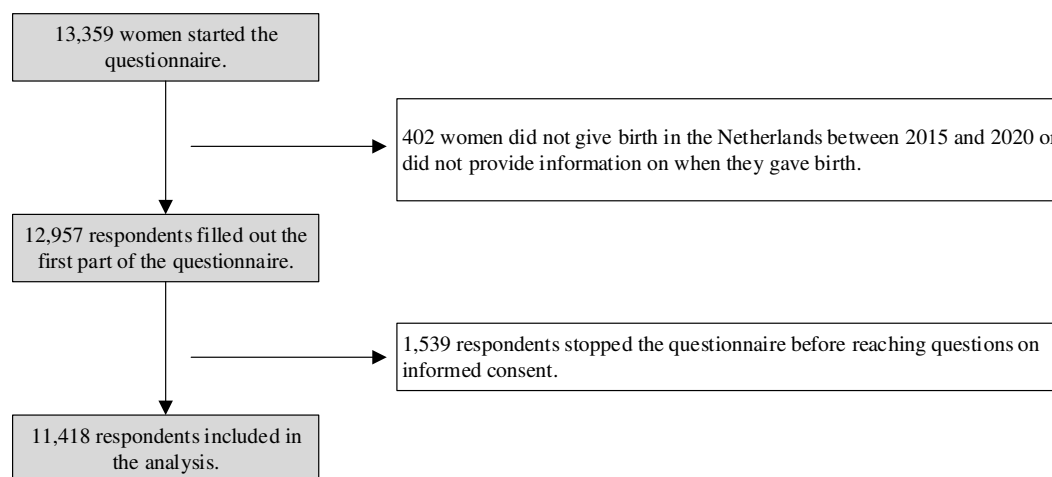

Supplement: inline-supplementary-material-5 [file inline-supplementary-material-5.pdf]
